# Supplementary material for: Biomass Logistics Network Design Under Price-Based Supply and Yield Uncertainty
Source: Atypon-hosted journal article supplement (doi:10.1287/trsc.2017.0766), 2017-08-24
Supplement: trsc.2017.0766-sm.pdf [file trsc.2017.0766-sm.pdf]

Online Supplement to  
“Biomass Logistics Network Design under Price based  
Supply and Yield Uncertainty”  
by Halit Üster and Gökhan Memişoğlu

A Acreages of Four Major Crops in Texas

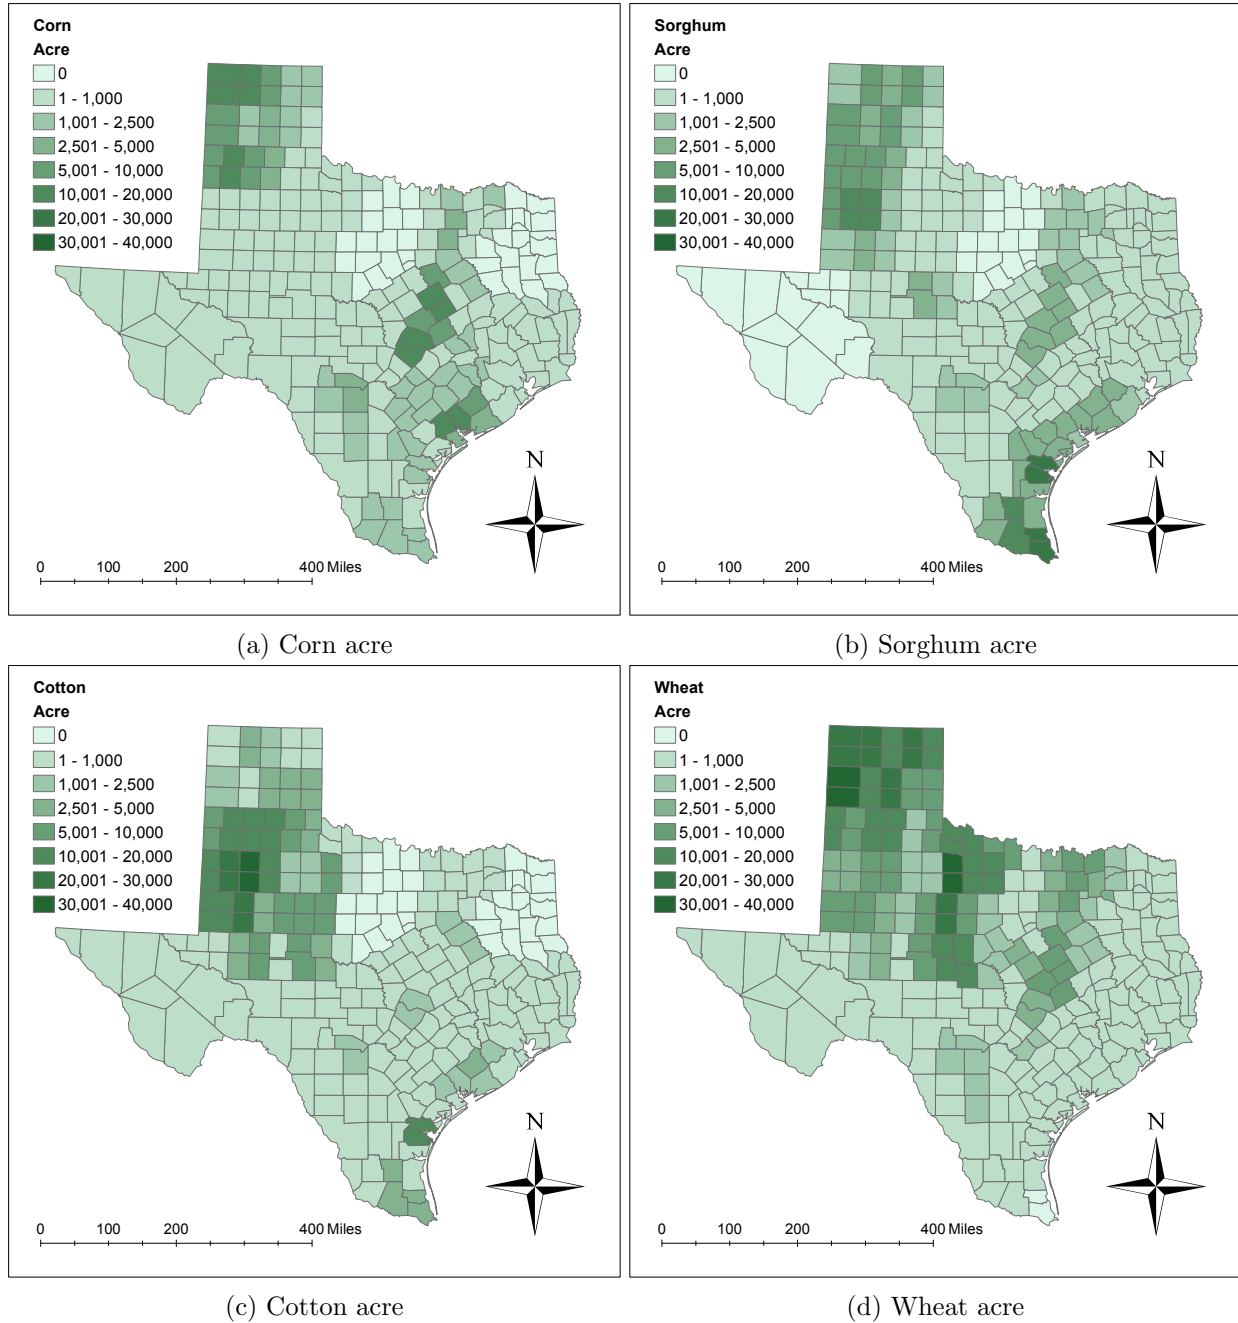

Figure A.1: Acreages of Four Major Crops in Texas

## B Unit biomass price under different settings

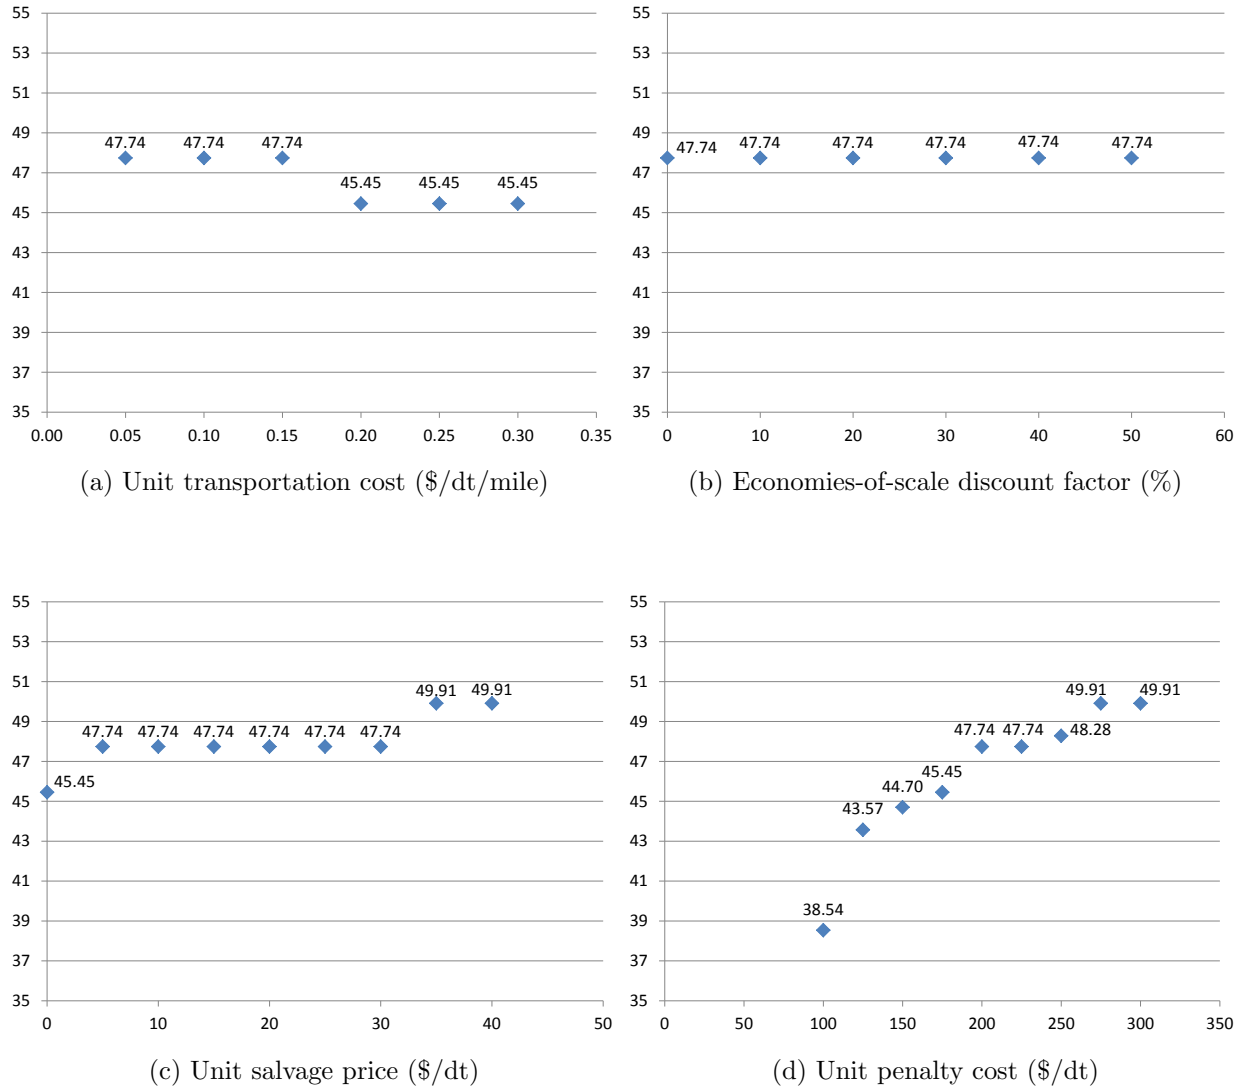

Figure B.1: Different parameter values (x-axes) vs. Unit biomass price (\$/dt, y-axis)

## C Network results under different settings

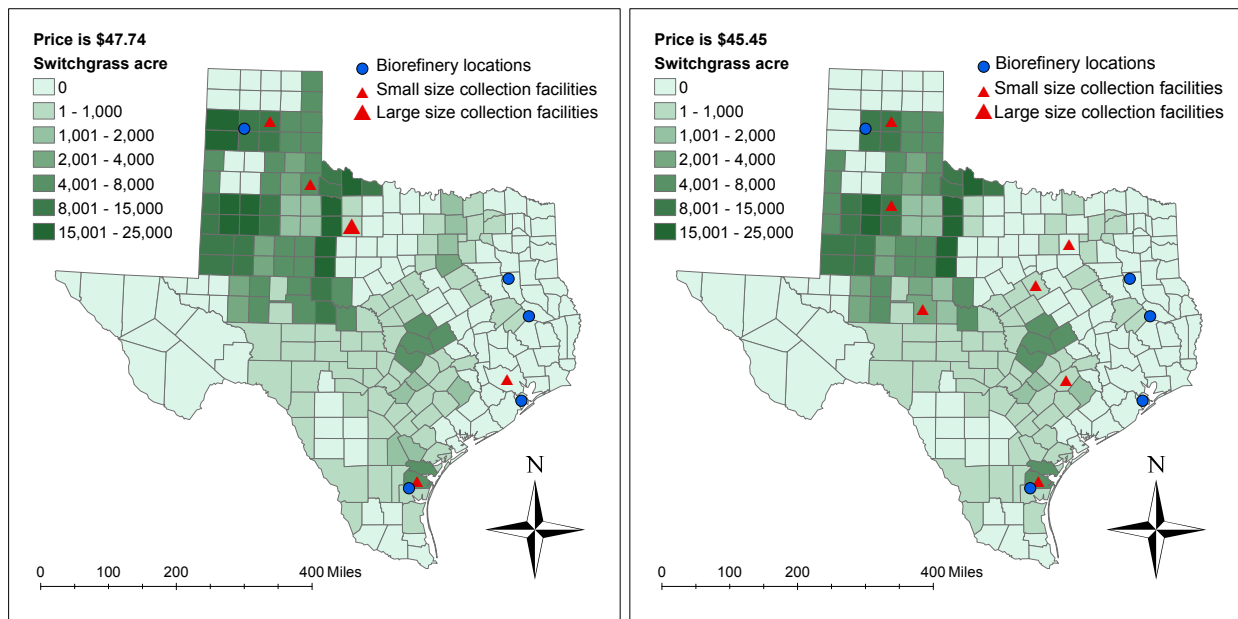

(a) Unit transportation cost is \$0.05/dt-mile

(b) Unit transportation cost is \$0.30/dt-mile

Figure C.1: Setting S1 - Supply chain under different unit transportation costs

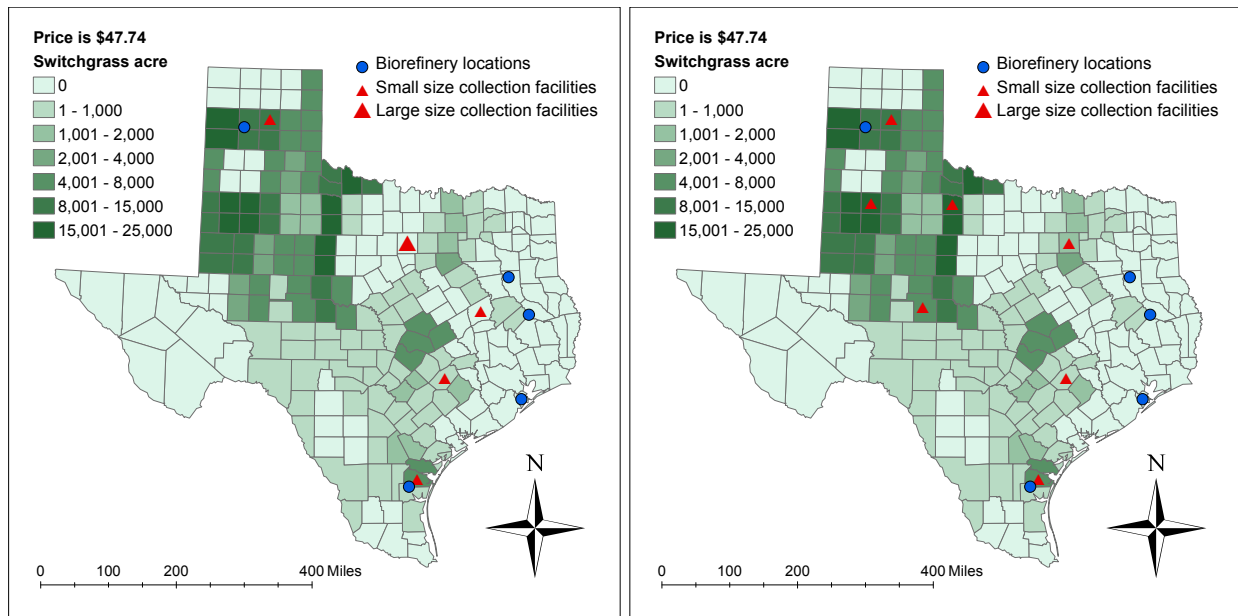

(a) Economies-of-scale discount factor is 0%

(b) Economies-of-scale discount factor is 30%

Figure C.2: Setting S2 - Supply chain structure under different economies-of-scale discount factors

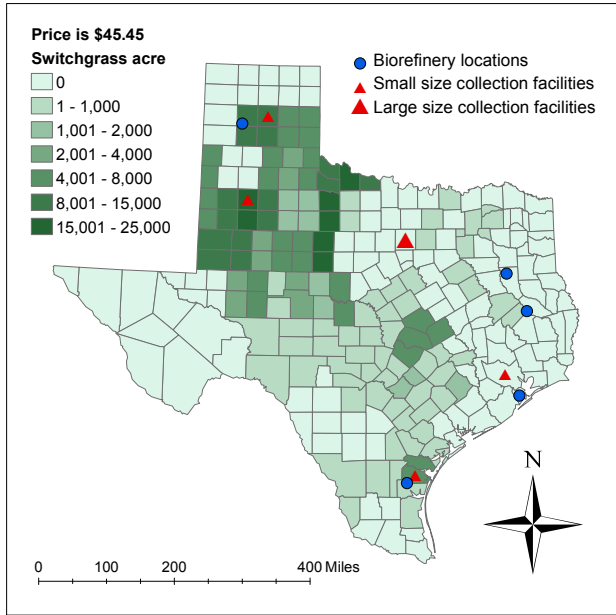

(a) Unit salvage price is \$0/dt

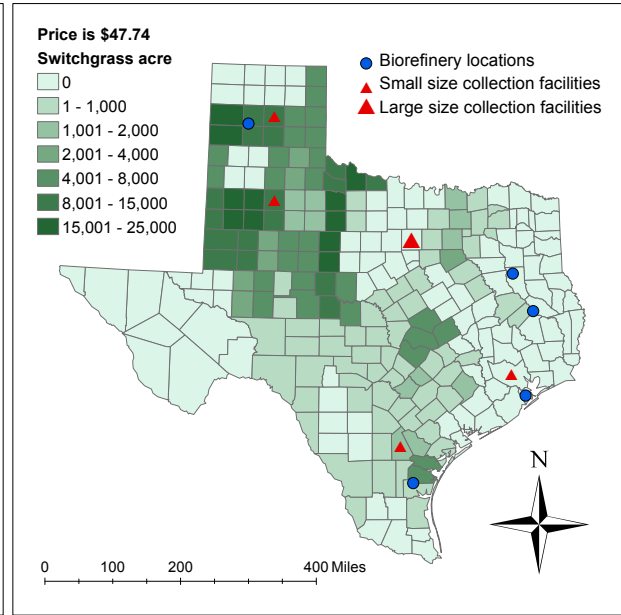

(b) Unit salvage price is \$40/dt

Figure C.3: Setting S3 - Supply chain structure under different unit salvage prices

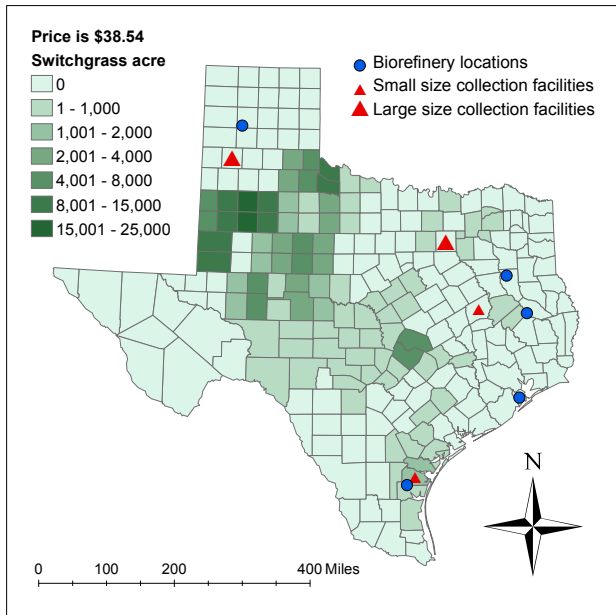

(a) Unit penalty cost is \$100/dt

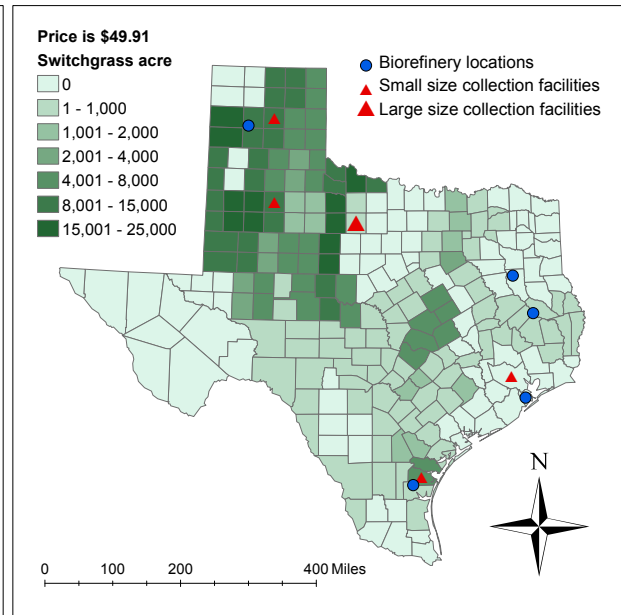

(b) Unit penalty cost is \$300/dt

Figure C.4: Setting S4 - Supply chain structure under different unit penalty costs

## D Total cost under different settings

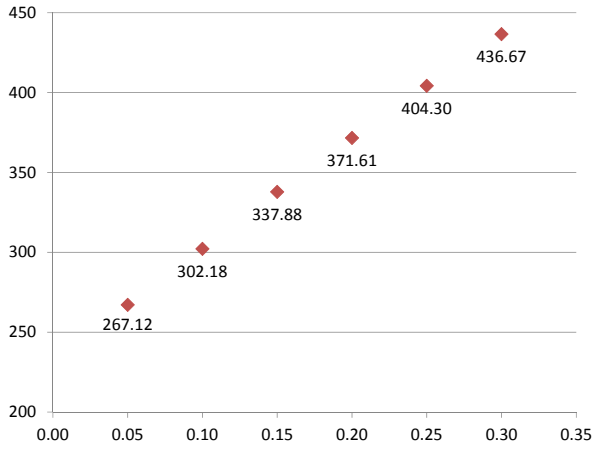

(a) Unit transportation cost (\$/dt/mile)

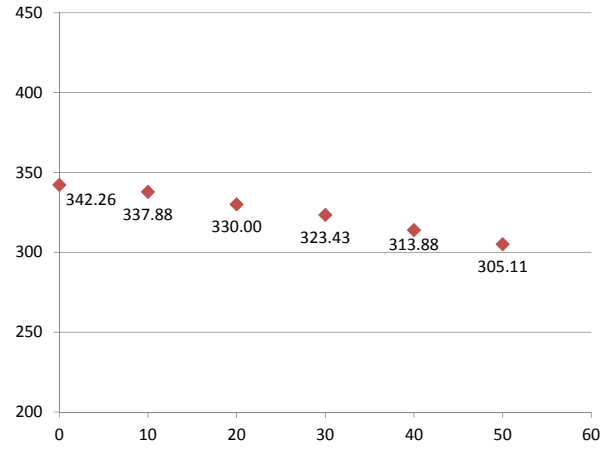

(b) Economies-of-scale discount factor (%)

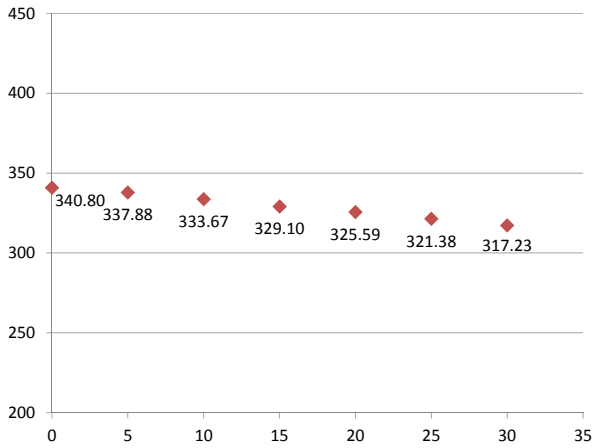

(c) Unit salvage price (\$/dt)

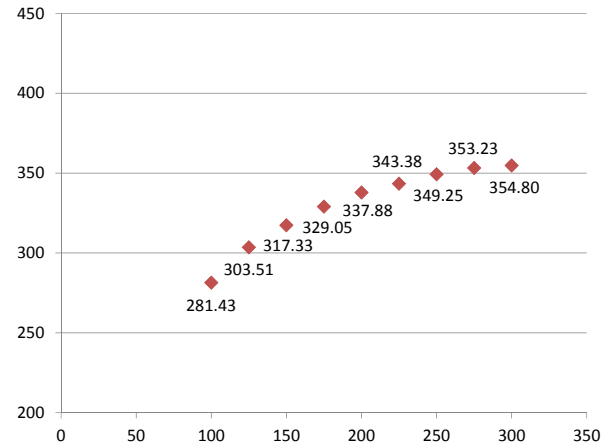

(d) Unit penalty cost (\$/dt)

Figure D.1: Different parameter values (x-axes) vs. Total system cost (\$ in millions, y-axis)
